# Supplementary material for: HPat a Decapping Activator Interacting with the miRNA Effector Complex
Source: PubMed Central journal article supplement (PMC3747071; doi:10.1371/journal.pone.0071860), 2013-08-19
Supplement: pone.0071860.s006.pdf [file pone.0071860.s006.pdf]

### Primer sequences for PCR fragments for dsRNA synthesis

| Target gene       | Primer sequence 5' to 3'                        |
|-------------------|-------------------------------------------------|
| DCP1 (SD301, fwd) | TAATACGACTCACTATAGGGAGATCGTGGATTCGTCCTCGCAC     |
| DCP1 (SD302, rev) | TAATACGACTCACTATAGGGAGACGGAGATTGAGCCGTAGCGTAG   |
| EDC4 (SD289, fwd) | TAATACGACTCACTATAGGGAGACGCTTGCACACTTGCCAATC     |
| EDC4 (SD290, rev) | TAATACGACTCACTATAGGGAGAGCTGCTGCAGACATAGGGAC     |
| NOT1 (SD196, fwd) | TAATACGACTCACTATAGGGAGAGCTCACTCAGCATCGCCATCG    |
| NOT1 (SD197, rev) | TAATACGACTCACTATAGGGAGAGTAGGCCGAAGGCCGACACAAT   |
| XRN1 (SD299, fwd) | TAATACGACTCACTATAGGGAGATGAACTGATCGAGGAACTGTGCC  |
| XRN1 (SD307, rev) | TAATACGACTCACTATAGGGAGACCAGCTGGCGCTTGCG         |
| AGO1 (SD310, fwd) | TAATACGACTCACTATAGGGAGACATTA AAAAGCTGACCGATATGC |
| AGO1 (SD311, rev) | TAATACGACTCACTATAGGGAGA TTGACGTTGATCTTCAGACACAG |
| YFP (SD308, fwd)  | TAATACGACTCACTATAGGGATGGTGAGCAAGGGCGAG          |
| YFP (SD309, rev)  | TAATACGACTCACTATAGGGAAGTTCACCTTGATGCC           |
