# Supplementary material for: HPat a Decapping Activator Interacting with the miRNA Effector Complex
Source: PubMed Central journal article supplement (PMC3747071; doi:10.1371/journal.pone.0071860), 2013-08-19
Supplement: pone.0071860.s007.pdf [file pone.0071860.s007.pdf]

### Primer sequences for qPCR analysis

| Target gene        | Primer Sequence 5' to 3'     |
|--------------------|------------------------------|
| EDC4 (fwd SD291)   | CCAGGTGTGCAAGAGCAAGCAAT      |
| EDC4 (rev SD292)   | AAGCTGGAATCAAGGTGCTGCTCATA   |
| DCP1 (fwd SD482)   | CAGCCACTGCTGAACTCGAC         |
| DCP1 (rev SD483)   | GTAGGCCTTGTGCAGCTTGT         |
| NOT1 (fwd SD466)   | GTCCCTGAAGCCTGTTGCCGTA       |
| NOT1 (rev SD467)   | AGGAGTGGGTCAAGGCCAAGG        |
| XRN1 (fwd SD592)   | TTTCACCTGGAGGAGGAGCAGA       |
| XRN1 (rev SD593)   | CGCTGCCGCTTGATCAGGTA         |
| Rp49 (fwd SD188)   | CACAAATGGCGCAAGCCCAAGGGTATCG |
| Rp49 (rev SD189)   | GGACCTCCAGCTCGCGCACGTT       |
| CG6770 (fwd SD480) | GAGGCCCACTTCGATGAGTACG       |
| CG6770 (rev SD481) | GTGCTCATTGGCCTCCCTCT         |
| CG5123 (fwd SD575) | CAGCAGAGTGCCCCGCAAAT         |
| CG5123 (rev SD576) | ATGGCCGTGCGGAAAGAACA         |
